# Supplementary material for: Influenza infection elicits an expansion of gut population of endogenous Bifidobacterium animalis which protects mice against infection
Source: PubMed Central journal article supplement (PMC7187530; doi:10.1186/s13059-020-02007-1), 2020-04-28
Supplement: 13059_2020_2007_MOESM12_ESM.pdf [file 13059_2020_2007_MOESM12_ESM.pdf]

|                                | GX.SG enriched(GX.SG vs. GX.DG) |      |      |      |      |       |       | GX.SG enriched(GX.SG vs. NC) |      |      |      |      |       |                                             |                                  |
|--------------------------------|---------------------------------|------|------|------|------|-------|-------|------------------------------|------|------|------|------|-------|---------------------------------------------|----------------------------------|
| Cellular Processes             |                                 |      | *    |      |      |       |       |                              |      |      |      |      |       | Cellular community – prokaryotes            |                                  |
|                                | **                              |      |      |      |      | **    | *     |                              |      |      |      |      |       | Cell growth and death                       |                                  |
| Genetic Information Processing |                                 |      | *    |      |      | *     |       |                              |      |      |      |      |       | Translation                                 |                                  |
|                                | *                               |      |      |      |      | *     |       |                              |      |      |      |      |       | Transcription                               |                                  |
|                                | **                              |      |      |      |      | *     |       |                              |      |      |      |      |       | Replication and repair                      |                                  |
|                                |                                 |      |      |      |      |       |       |                              |      |      |      |      |       |                                             | Folding, sorting and degradation |
| Human Diseases                 | **                              |      |      |      |      |       |       |                              |      |      |      |      |       | Substance dependence                        |                                  |
|                                | **                              |      |      |      |      |       |       |                              |      |      |      |      |       | Neurodegenerative diseases                  |                                  |
|                                |                                 |      |      |      |      | *     | **    | *                            |      |      |      |      |       | Infectious diseases Bacterial               |                                  |
|                                |                                 |      |      |      | **   | **    | ***   |                              |      |      |      | *    |       | Immune diseases                             |                                  |
|                                |                                 |      |      |      |      |       |       |                              | *    |      |      |      |       |                                             | Endocrine and metabolic diseases |
|                                | *                               |      | *    | *    | *    | **    | ***   |                              |      |      |      |      |       |                                             | Drug resistance Antineoplastic   |
|                                |                                 |      |      |      |      | **    | *     |                              |      |      |      |      |       |                                             | Cardiovascular diseases          |
| Metabolism                     |                                 |      |      | *    |      |       |       |                              |      |      |      |      |       | Xenobiotics biodegradation and metabolism   |                                  |
|                                | *                               |      |      |      |      | **    | *     | *                            |      |      |      |      |       | Nucleotide metabolism                       |                                  |
|                                |                                 |      |      |      |      | **    | *     |                              |      |      |      |      |       | Metabolism of terpenoids and polyketides    |                                  |
|                                | *                               |      |      |      |      | **    | **    | *                            |      |      |      |      |       | Metabolism of other amino acids             |                                  |
|                                | *                               |      |      |      |      | **    | **    |                              |      |      |      |      |       | Metabolism of cofactors and vitamins        |                                  |
|                                |                                 |      |      |      |      | *     | *     |                              |      |      |      |      |       | Lipid metabolism                            |                                  |
|                                | *                               |      |      |      |      | *     |       |                              |      |      |      |      |       | Glycan biosynthesis and metabolism          |                                  |
|                                | *                               |      |      |      |      | *     |       |                              |      |      |      |      |       | Energy metabolism                           |                                  |
|                                | *                               |      |      |      |      | **    | **    | *                            |      |      |      |      |       | Carbohydrate metabolism                     |                                  |
|                                |                                 |      |      |      |      | **    | **    |                              |      |      |      |      |       | Biosynthesis of other secondary metabolites |                                  |
|                                | *                               |      |      |      |      | *     | *     | *                            |      |      |      |      |       | Amino acid metabolism                       |                                  |
| Organismal Systems             |                                 |      |      |      | *    |       |       |                              |      |      |      |      |       | Immune system                               |                                  |
|                                |                                 |      |      |      | *    |       |       |                              |      |      |      |      |       | Environmental adaptation                    |                                  |
|                                | *                               |      |      |      |      | *     | **    | *                            |      |      |      |      |       | Endocrine system                            |                                  |
|                                | **                              |      |      |      |      | **    | **    |                              |      |      |      |      |       | Digestive system                            |                                  |
|                                |                                 |      |      |      |      | *     |       |                              |      |      |      |      |       | Aging                                       |                                  |
|                                | Day0                            | Day2 | Day5 | Day8 | Day9 | Day10 | Day11 | Day0                         | Day2 | Day5 | Day8 | Day9 | Day10 | Day11                                       |                                  |
